# Supplementary material
Source: PubMed Central journal article supplement (PMC3861712)
Supplement: supp_M113.027383_mcp.M113.027383-5.pdf [file supp_M113.027383_mcp.M113.027383-5.pdf]

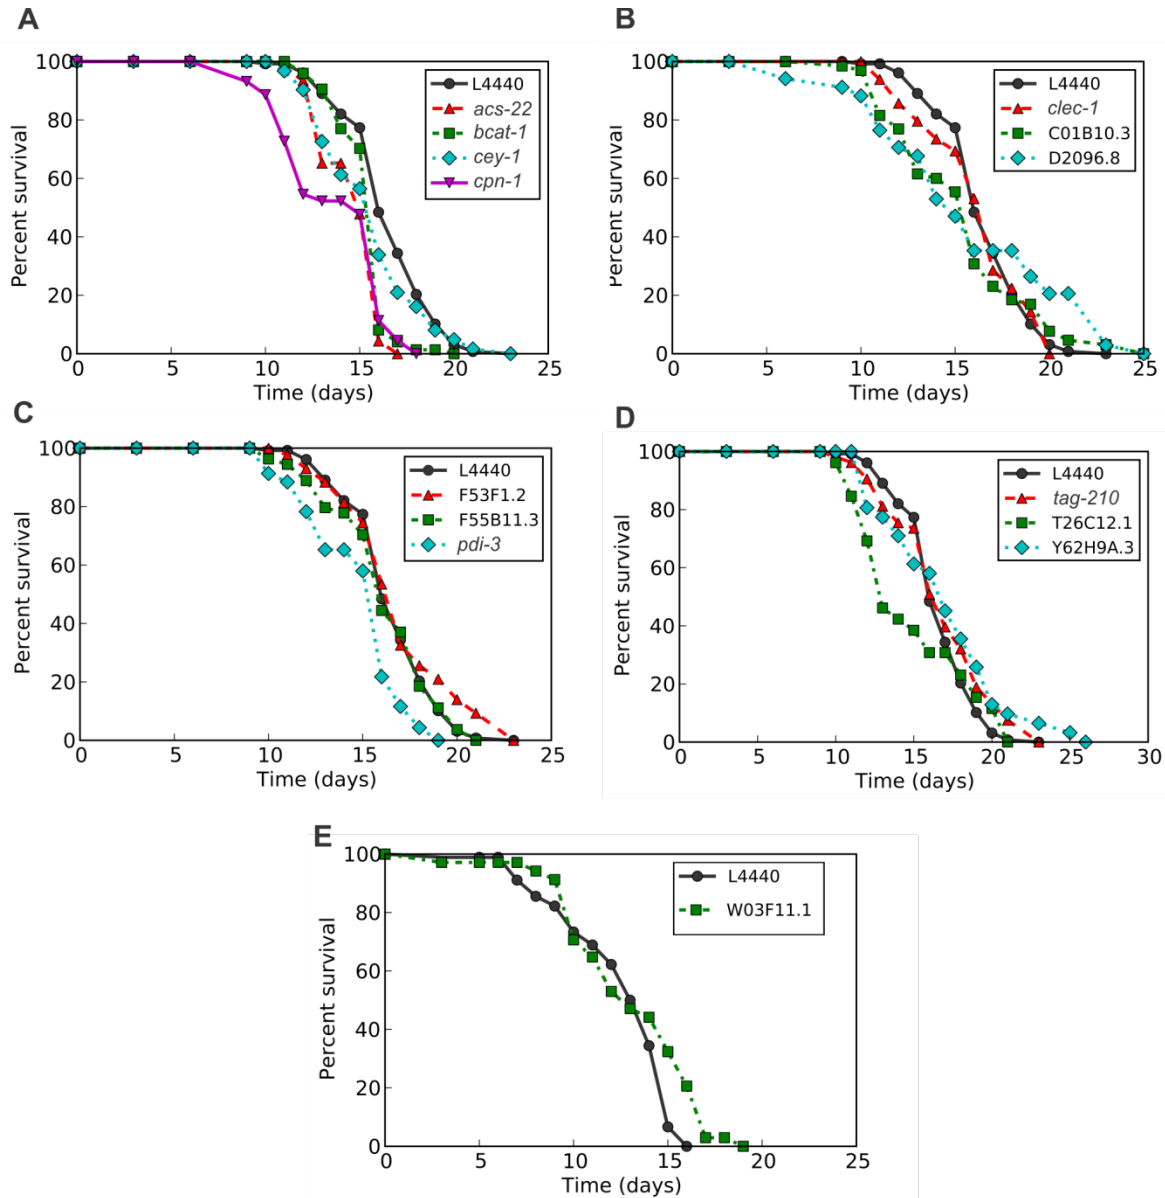

Survival curves of *rrf-3(pk1426)* worms subjected to RNAi at 20°C. RNAi treatment was started from L1 (A-D) or at day 0 of adulthood (E). Please see **table 2** for statistics and additional lifespan analysis results.

| RNAi  | RNAi start | n   | Mean lifespan (days) | % change | P value | 95% C.I.      |
|-------|------------|-----|----------------------|----------|---------|---------------|
| L4440 | L1*        | 128 | 16.61                | -        | -       | 16.22 ~ 17.00 |
| L4440 | d0 (1)     | 180 | 12.5                 | -        | -       | 12.07 ~ 12.93 |
| L4440 | d0 (2)     | 83  | 12.83                | -        | -       | 12.35 ~ 13.31 |

|                |        |     |       |               |                 |               |
|----------------|--------|-----|-------|---------------|-----------------|---------------|
| L4440          | d0 (3) | 122 | 11.19 | -             | -               | 10.63 ~ 11.74 |
| <i>acs-22</i>  | L1*    | 46  | 14.74 | <b>-11.3%</b> | <b>2.00E-09</b> | 14.29 ~ 15.19 |
| <i>acs-22</i>  | d0 (1) | 39  | 12.85 | 2.8%          | 4.53E-01        | 11.97 ~ 13.72 |
| <i>acs-22</i>  | d0 (2) | 18  | 10    | <b>-22.1%</b> | <b>8.00E-04</b> | 8.57 ~ 11.43  |
| <i>acs-22</i>  | d0 (3) | 43  | 10.4  | -7.1%         | 1.22E-01        | 9.63 ~ 11.16  |
| <i>bcat-1</i>  | L1*    | 74  | 15.49 | <b>-6.7%</b>  | <b>1.50E-06</b> | 15.18 ~ 15.80 |
| <i>bcat-1</i>  | d0 (1) | 32  | 11.91 | <b>-4.7%</b>  | <b>6.00E-04</b> | 11.18 ~ 12.63 |
| <i>bcat-1</i>  | d0 (2) | 25  | 11.4  | <b>-11.1%</b> | <b>1.10E-03</b> | 10.71 ~ 12.09 |
| <i>bcat-1</i>  | d0 (3) | 42  | 10.83 | -3.2%         | 3.46E-01        | 10.03 ~ 11.62 |
| C01B10.3       | L1*    | 65  | 15.43 | -7.1%         | 3.00E-01        | 14.56 ~ 16.31 |
| C01B10.3       | d0 (1) | 29  | 12.66 | 1.3%          | 2.02E-01        | 11.44 ~ 13.87 |
| C01B10.3       | d0 (2) | 41  | 12.7  | -1.0%         | 8.96E-01        | 11.95 ~ 13.45 |
| C01B10.3       | d0 (3) | 50  | 13.2  | <b>18.0%</b>  | <b>1.40E-03</b> | 12.19 ~ 14.21 |
| <i>cey-1</i>   | L1*    | 62  | 15.65 | -5.8%         | 6.50E-02        | 14.99 ~ 16.30 |
| <i>cey-1</i>   | d0 (1) | 37  | 13.81 | <b>10.5%</b>  | <b>1.00E-04</b> | 12.45 ~ 15.17 |
| <i>cey-1</i>   | d0 (2) | 32  | 12.09 | -5.8%         | 2.17E-01        | 11.19 ~ 13.00 |
| <i>cey-1</i>   | d0 (3) | 42  | 10.75 | -3.9%         | 1.32E-01        | 10.05 ~ 11.45 |
| <i>clcc-41</i> | L1*    | 49  | 16.2  | -2.5%         | 7.53E-01        | 15.46 ~ 16.95 |
| <i>clcc-41</i> | d0 (1) | 36  | 11.83 | -5.4%         | 2.30E-01        | 10.78 ~ 12.87 |
| <i>clcc-41</i> | d0 (2) | 42  | 13.05 | 1.7%          | 5.24E-01        | 12.30 ~ 13.80 |
| <i>clcc-41</i> | d0 (3) | 67  | 11.97 | 7.0%          | 7.94E-02        | 10.99 ~ 12.95 |
| <i>cpn-1</i>   | L1*    | 44  | 13.77 | <b>-17.1%</b> | <b>0.00E+00</b> | 12.97 ~ 14.58 |
| <i>cpn-1</i>   | d0 (1) | 38  | 13.34 | <b>6.7%</b>   | <b>4.20E-03</b> | 12.37 ~ 14.32 |
| <i>cpn-1</i>   | d0 (2) | 31  | 12.43 | -3.1%         | 1.46E-01        | 11.93 ~ 12.93 |
| <i>cpn-1</i>   | d0 (3) | 20  | 11.4  | 1.9%          | 9.97E-01        | 10.33 ~ 12.47 |
| <i>cth-1</i>   | L1*    | 44  | 16.59 | -0.1%         | 6.80E-01        | 15.64 ~ 17.54 |
| <i>cth-1</i>   | d0 (1) | 18  | 11.72 | -6.2%         | 3.62E-01        | 10.31 ~ 13.13 |
| <i>cth-1</i>   | d0 (2) | 44  | 12.77 | -0.5%         | 9.26E-01        | 12.09 ~ 13.45 |
| <i>cth-1</i>   | d0 (3) | 28  | 11.25 | 0.5%          | 9.53E-01        | 10.30 ~ 12.20 |
| D2096.8        | L1*    | 34  | 15.76 | -5.1%         | 2.31E-01        | 14.05 ~ 17.47 |
| D2096.8        | d0 (1) | 33  | 13.73 | <b>9.8%</b>   | <b>1.00E-04</b> | 12.49 ~ 14.97 |
| D2096.8        | d0 (2) | 13  | 12.1  | -5.7%         | 1.40E-01        | 11.40 ~ 12.80 |
| D2096.8        | d0 (3) | 36  | 11.14 | -0.4%         | 8.78E-01        | 10.23 ~ 12.05 |
| <i>pdi-3</i>   | L1*    | 69  | 14.84 | <b>-10.7%</b> | <b>2.20E-06</b> | 14.25 ~ 15.43 |
| <i>pdi-3</i>   | d0 (1) | 42  | 13.17 | 5.4%          | 1.19E-01        | 12.41 ~ 13.92 |
| <i>pdi-3</i>   | d0 (3) | 51  | 10.96 | -2.1%         | 7.36E-01        | 10.09 ~ 11.83 |
| F13D12.6       | d0 (3) | 55  | 11.8  | 5.5%          | 4.50E-01        | 11.14 ~ 12.46 |
| F53F1.2        | L1*    | 43  | 17    | 2.3%          | 1.47E-01        | 16.11 ~ 17.89 |
| F53F1.2        | d0 (1) | 33  | 12.58 | 0.6%          | 3.57E-01        | 11.51 ~ 13.64 |
| F53F1.2        | d0 (2) | 32  | 12.4  | -3.4%         | 1.94E-01        | 11.77 ~ 13.02 |
| F53F1.2        | d0 (3) | 38  | 11.47 | 2.5%          | 8.21E-01        | 10.69 ~ 12.26 |

|                |         |    |       |              |                 |               |
|----------------|---------|----|-------|--------------|-----------------|---------------|
| F55B11.3       | L1*     | 54 | 16.22 | -2.3%        | 7.24E-01        | 15.51 ~ 16.94 |
| F55B11.3       | d0 (1)  | 34 | 13.15 | 5.2%         | 8.30E-02        | 12.21 ~ 14.09 |
| F55B11.3       | d0 (2)  | 29 | 11.86 | <b>-7.6%</b> | <b>1.49E-02</b> | 11.26 ~ 12.46 |
| F55B11.3       | d0 (3)  | 81 | 10.77 | -3.8%        | 2.29E-01        | 10.20 ~ 11.33 |
| T24B8.5        | L1*     | 74 | 16.85 | 1.4%         | 1.27E-01        | 16.19 ~ 17.51 |
| T24B8.5        | d0 (1)  | 38 | 12.45 | -0.4%        | 4.17E-01        | 11.58 ~ 13.32 |
| T24B8.5        | d0 (2)  | 45 | 12.35 | -3.7%        | 2.04E-01        | 11.72 ~ 12.99 |
| T24B8.5        | d0 (3)  | 54 | 11.67 | 4.3%         | 6.52E-01        | 11.05 ~ 12.28 |
| T26C12.1       | L1*     | 26 | 14.88 | -10.4%       | 2.46E-01        | 13.54 ~ 16.23 |
| T26C12.1       | d0 (1)  | 30 | 11.63 | -7.0%        | 2.80E-01        | 10.64 ~ 12.63 |
| T26C12.1       | d0 (2)  | 39 | 12.44 | -3.0%        | 1.64E-01        | 11.99 ~ 12.88 |
| T26C12.1       | d0 (3)  | 31 | 11.19 | 0.0%         | 8.90E-01        | 10.16 ~ 12.23 |
| <i>tag-210</i> | L1*     | 53 | 16.85 | 1.4%         | 1.10E-01        | 16.00 ~ 17.70 |
| <i>tag-210</i> | d0 (1)  | 32 | 13.19 | <b>5.5%</b>  | <b>1.11E-02</b> | 11.86 ~ 14.52 |
| <i>tag-210</i> | d0 (2)  | 34 | 12.35 | -3.7%        | 1.69E-01        | 11.66 ~ 13.04 |
| <i>tag-210</i> | d0 (3)  | 30 | 11.1  | -0.8%        | 7.70E-01        | 10.09 ~ 12.11 |
| Y62H9A.3       | L1*     | 31 | 17.03 | 2.5%         | 7.44E-02        | 15.70 ~ 18.37 |
| Y62H9A.3       | d0 (1)  | 30 | 12.17 | -2.6%        | 5.66E-01        | 11.03 ~ 13.31 |
| Y62H9A.3       | d0 (2)  | 29 | 11.69 | -8.9%        | 1.60E-02        | 10.92 ~ 12.46 |
| Y62H9A.3       | d0 (3)  | 27 | 10.78 | -3.7%        | 5.15E-01        | 9.67 ~ 11.89  |
| W03F11.1       | d0 (1)* | 35 | 13.1  | <b>4.8%</b>  | <b>4.30E-03</b> | 11.95 ~ 14.24 |
| W03F11.1       | d0 (2)* | 74 | 12.53 | <b>12.0%</b> | <b>1.15E-02</b> | 11.75 ~ 13.30 |

**Lifespan analysis of *rrf-3(pk1426)* mutants subjected to RNAi of genes downregulated in both *daf-2* and DR worms.** *rrf-3(pk1426)* worms were either fed bacteria containing the empty control vector (L4440) or a vector expressing a specific dsRNA. RNAi treatment was started at juvenile L1 stage or when worms had reached pre-fertile adulthood (d0). 2'fluoro-5'deoxyuridine (FUdR; f.c. 50  $\mu$ M) was added to the plates to prevent the production of progeny. Worms were kept at 20°C throughout the experiment. Mean lifespan in days. 'n', the number of worms under assay. '95% C.I.', the 95% confidence interval of mean lifespan. '\*' Survival curve shown above.
