# Supplementary material
Source: PubMed Central journal article supplement (PMC3861712)
Supplement: supp_M113.027383_mcp.M113.027383-6.pdf [file supp_M113.027383_mcp.M113.027383-6.pdf]

1 In this supplemental section we will discuss several distinct sets of differentially expressed proteins that  
2 are unique for either *daf-2* or dietary-restricted nematodes (**Supplemental table 1**). In addition we  
3 provide an overview of key, previous transcriptome-derived associations between gene  
4 categories/functions and longevity are corroborated or not by our present proteomic analysis.

### 5 **Upregulation of proteasome subunits upon DR**

6 Annotation clustering indicated overrepresentation of proteasome subunits among upregulated  
7 proteins in DR worms (**Supplemental table 1**). Indeed, several  $\alpha$  and  $\beta$  subunits of the 20S core- and 19S  
8 regulator complex of the proteasome were increased significantly in DR worms (**Supplemental figure 1**),  
9 which is confirmed by GSEA ( $NES_{DR} = 2.08$ ;  $P < 0.001$ ;  $FDR < 0.003$ ). The (oxidative) stress-responsive  
10 Nrf/SKN-1 transcription factor is a potent regulator of 26S proteasome subunit gene expression in both  
11 mammals and *C. elegans* (Kwak *et al.* 2003; Oliveira *et al.* 2009; Li *et al.* 2011; Niu *et al.* 2011).  
12 Furthermore, inhibition of proteasomal gene expression by RNAi results in activation of Nrf/SKN-1 and  
13 subsequent compensatory upregulation of proteasomal subunits in both mammals and *C. elegans* (Kraft  
14 *et al.* 2006; Kahn *et al.* 2008; Radhakrishnan *et al.* 2010; Li *et al.* 2011). We therefore hypothesize that  
15 SKN-1 is responsible for the observed increased levels of 26S proteasome subunits in DR nematodes,  
16 since activation of SKN-1 in the ASI neurons is required for lifespan extension by bacterial dilution  
17 induced DR (Bishop & Guarente 2007). In response to (oxidative) stress, SKN-1 translocates to the  
18 nucleus and regulates the expression of hundreds of genes (An & Blackwell 2003; Tullet *et al.* 2008;  
19 Oliveira *et al.* 2009). Since it has been established that the 20S core of the proteasome is responsible for  
20 the degradation of the majority of oxidatively damaged proteins, it makes sense that regulation of  
21 proteasomal subunit expression should fall under the control of SKN-1 (Davies 2001; Breusing & Grune  
22 2008; Wang *et al.* 2010). It also follows that increased proteasome expression could potentially alleviate

23 age-related oxidative damage resulting in lifespan extension of diet-restricted animals (Opalach *et al.*  
24 2010).

25

## 26 ***daf-2*-specific upregulation of transthyretin-like proteins**

27 The abundance of several nematode-specific proteins containing a transthyretin-like (TTR-like) domain  
28 was significantly increased in *daf-2(e1370)* mutants ( $NES_{daf-2} = 1.73$ ,  $P = 0.003$ ;  $FDR = 0.017$ ;  
29 **Supplemental figure 2F**). This finding is consistent with reported transcriptional activation of TTR-like  
30 genes in *daf-2* mutants and/or dauers (McElwee *et al.* 2004). *C. elegans* encodes 59 genes that contain a  
31 transthyretin-like domain, with rather weak similarities to mammalian transthyretin (Sonnhammer &  
32 Durbin 1997). In mammals, transthyretin is best known as a transporter for the thyroid hormone,  
33 thyroxine (T4) and retinol (vitamin A). However, in recent years, a much larger diversity in function and  
34 ligand binding for TTR has been acknowledged, especially as a neuroprotective component in  
35 neurodegenerative diseases, such as Alzheimer's and Parkinson's disease (Fleming *et al.* 2009). In  
36 nematodes, nothing is known about the ligand-specificity and respective functions of TTR-like proteins,  
37 although a predicted signal sequence suggests a transmembrane location (Sonnhammer & Durbin 1997).  
38 TTR-like proteins were also found among the most represented in the excreted/secreted proteome of  
39 parasitic nematodes (Nagaraj *et al.* 2008). Given the evolutionary conservation of the ligand-binding  
40 site, McElwee *et al.* (2004) have proposed some TTRs may play an active role in binding and excreting  
41 potentially toxic lipophilic compounds (McElwee *et al.* 2004). However, affinity-purified transthyretin-  
42 like protein 1 (TTL-1) from the nematode *Ostertagia ostertagia*, which shows high sequence similarity  
43 with several *C. elegans* TTR-like proteins, was devoid of any lipid and thyroid hormone binding  
44 properties (Saverwyns *et al.* 2008). Notably, RNAi against *ttr-1* extends nematode life-span in a *daf-16*  
45 dependent fashion and enhances dauer formation, suggesting a role for TTR-1 as part of the IIS pathway

46 (Hansen *et al.* 2005). Several TTR-like genes were induced upon infection with pathogenic LF82 *E. coli*,  
47 which suggests TTR-like proteins could be involved in the immune response (Simonsen *et al.* 2011).

#### 48 **Differential expression of proteins involved in the stress response and innate immunity**

49 We observed DAF-16-induced upregulation of several glutathione-S-transferases (GSTs) and one UDP-  
50 glucuronosyltransferase (UGT) (**Supplemental figure 2A**). GSTs and UGTs are key enzymes in phase 2  
51 detoxification by conjugation of xenobiotic or endobiotic lipophilic compounds to glutathione and UDP-  
52 glucuronic acid, which greatly facilitates their excretion from the cell (phase 3) (Tukey & Strassburg  
53 2000; Sheehan *et al.* 2001; Ayyadevara *et al.* 2007). Some GSTs are also involved in oxidative-stress  
54 resistance (Tawe *et al.* 1998; Leiers *et al.* 2003). The *C. elegans* genome is predicted to encode 44 GSTs  
55 and 65 UGTs and several groups have reported DAF-16 and/or SKN-1-dependent transcriptional  
56 upregulation of numerous UGTs and GSTs (An & Blackwell 2003; Murphy *et al.* 2003; Wang & Kim 2003;  
57 McElwee *et al.* 2004; Ayyadevara *et al.* 2005a; Halaschek-Wiener *et al.* 2005; Tullet *et al.* 2008; Oliveira  
58 *et al.* 2009; Jones *et al.* 2010). GST-10 was shown to be required for full *daf-2* longevity and its over-  
59 expression increases wild-type mean lifespan (Ayyadevara *et al.* 2005a; Ayyadevara *et al.* 2005b). We  
60 note that GST-42 encodes a putative maleylacetoacetate isomerase that participates in tyrosine  
61 catabolism, which is upregulated in *daf-2* and requires glutathione as coenzyme. Therefore, GST-42 as  
62 such has probably no direct role in detoxification or oxidative stress metabolism.

63 We also detected two cadmium responsive (CDR) gene products, CDR-2 and CDR-4, which appear  
64 induced by DAF-16 (**Supplemental figure 2A**). The CDR gene family in *C. elegans* consists of seven  
65 hydrophobic, lysosomal membrane proteins with a conserved glutathione-S-transferase domain (Dong  
66 *et al.* 2005; Dong *et al.* 2008; Hunter *et al.* 2009). Their promoter region contains different stress-  
67 responsive elements (antioxidant-, heatshock- and metal-responsive elements). However, the exact role  
68 of these genes in the stress response remains to be determined.

69 Another aspect of the stress response is the conservation of existing proteins via molecular  
70 chaperones/heat shock proteins (HSPs). Although we detected differential expression of several HSPs,  
71 only one (T05E11.3, an ortholog of the GRP94/GP96 branch of HSP90 heat shock factors) was  
72 upregulated in *daf-2* mutants (**Supplemental figure 2B**). UGGT-1 which is also DAF-16-induced, encodes  
73 one of two *C. elegans* UDP-Glc:glycoprotein glucosyltransferases (UGGTs), which is responsible for  
74 monitoring the correct folding of glycoproteins in the ER by glycosylating not properly folded  
75 glycoproteins and targeting them for proteasomal degradation (Guerin & Parodi 2003; Buzzi *et al.* 2011).

76 Strong DAF-16-dependent transcriptional activation of HSP20/ $\alpha$ -crystallins or small heatshock proteins  
77 (sHSPs) was previously observed in *daf-2* mutants (Hsu *et al.* 2003; Murphy *et al.* 2003; McElwee *et al.*  
78 2004). This activation of sHSPs is required for the full lifespan extension in *daf-2* mutants (Hsu *et al.*  
79 2003). Y55F3BR.6 and HSP12.2 represent two sHSPs in our dataset (Kokke *et al.* 1998). Interestingly,  
80 these sHSPs appear specifically activated in DR but not in *daf-2* mutants. This suggests that (a subset of)  
81 sHSPs are possibly also involved in DR-induced lifespan extension. Surprisingly, several HSPs are actually  
82 down-regulated in *daf-2* mutants (DAF-21, HSP-1, DNJ-19), dietary restriction (T24H7.2), or in both *daf-2*  
83 and DR worms (HSP-6). Previously, RNAi of *daf-21* and *hsp-1*, but not *dnj-19*, was shown to result in a  
84 small reduction in *age-1(hx546)* lifespan, and RNAi of *daf-21* increased susceptibility to pathogen  
85 infection (Morley & Morimoto 2004; Singh & Aballay 2006). DAF-21 is a member of the HSP90 family of  
86 heat shock factors, but it is also part of a guanylyl-cyclase-dependent chemosensory pathway that likely  
87 underlies DAF-21's involvement in the constitutive dauer formation phenotype (Birnby *et al.* 2000). HSP-  
88 6 is a mitochondrial-specific chaperone of the HSP70 superfamily involved in the mitochondrial UPR  
89 (mtUPR), which has recently been implicated in ETC-mediated longevity (Yoneda *et al.* 2004; Durieux *et*  
90 *al.* 2011). The level of HSP-6 also appears to correlate with *C. elegans* lifespan; overexpression of HSP-6  
91 results in lifespan extension, whereas RNAi of *hsp-6* was reported to cause mitochondrial dysfunction  
92 and decreased lifespan (Yokoyama *et al.* 2002; Yoneda *et al.* 2004; Kimura *et al.* 2007). We note that

93 other groups have reported similar findings on the expression level of DAF-21 and HSP-6 in *daf-2*  
94 mutants (Dong *et al.* 2007; Durieux *et al.* 2011). We can conclude that impaired IIS does not lead to a  
95 general upregulation of HSPs, and regulation of HSPs appears more complex. Interestingly, similar  
96 conclusions were drawn from an HSP expression study in Ames dwarf mice deficient in growth  
97 hormone/IGF-1 signaling, where expression of several HSPs actually correlate positively with the level of  
98 IIS (Swindell *et al.* 2009).

99 Several proteins implicated in the oxidative stress response were upregulated in *daf-2* mutants,  
100 including, catalases (CTL-2 and CTL-1/-3), superoxide dismutase (SOD-1), 2-Cys peroxiredoxin (PRDX-3),  
101 glutaredoxin (GLRX-10) and glutathione peroxidase (R05H10.5), consistent with increased oxidative  
102 stress resistance of *daf-2* mutants (**Supplemental figure 2C**) (Larsen 1993; Vanfleteren 1993; Honda &  
103 Honda 1999). Interestingly, protein levels of R05H5.3, a thioredoxin, and MSRA-1, the single methionine  
104 sulfoxide reductase A (MsrA) gene in *C. elegans* (Lee *et al.* 2005), are reduced in *daf-2* mutants. MsrA is  
105 an important antioxidant enzyme that repairs oxidatively damaged methionine residues and is well-  
106 conserved from prokaryotes to eukaryotes (Cabreiro *et al.* 2006; Kim & Gladyshev 2007). The *C. elegans*  
107 genome encodes a single MsrA gene (*msra-1*) with biochemically confirmed methionine sulfoxide  
108 reductase activity (Lee *et al.* 2005). Similar to other species, mutation in *msra-1* renders *C. elegans*  
109 hypersensitive to oxidative stress, reducing both wild-type and *daf-2* lifespan (Minniti *et al.* 2009).  
110 Remarkably, Minniti *et al.* report increased *daf-16*-dependent MSRA-1 enzyme activity in adult *daf-2*  
111 mutants that increases even further with advancing age. This is unexpected in light of our own finding  
112 that total MSRA-1 protein levels in *daf-2* mutants are robustly and consistently decreased. This could  
113 imply strong post-translational regulation of MSRA-1 enzyme activity.

114 Increased expression of antioxidant enzymes is thought to be an essential part of the worms' innate  
115 immunity. In response to pathogenic bacteria *C. elegans* generates ROS at the site of infection in order  
116 to kill off the offending pathogens (Chavez *et al.* 2007; Chavez *et al.* 2009). Since this is detrimental to

117 the local endogenous tissue as well as proteins, the worm protects itself from excessive damage by  
118 concurrently activating antioxidant enzymes and heat-shock proteins through DAF-16 and SKN-1 (Chavez  
119 *et al.* 2007; Mohri-Shiomi & Garsin 2008; Chavez *et al.* 2009; Hoeven *et al.* 2011). Therefore, the over-  
120 expression of anti-oxidant enzymes in IIS mutants explains their increased resistance to various bacterial  
121 pathogens (Garsin *et al.* 2003; Troemel *et al.* 2006; Wang *et al.* 2011). In addition to anti-oxidant  
122 enzymes, whole-genome transcript profiling studies have revealed DAF-16-dependent gene regulation  
123 of other known antimicrobial proteins, including C-type lectins (CLECs), lysozymes and saposins  
124 (McElwee *et al.* 2003; Murphy *et al.* 2003; Halaschek-Wiener *et al.* 2005). CLECs and lysozymes are an  
125 important part of the innate immune response in many animals, including *C. elegans* (Mallo *et al.* 2002;  
126 O'Rourke *et al.* 2006; Troemel *et al.* 2006; Alper *et al.* 2007; Wong *et al.* 2007; Schulenburg *et al.* 2008;  
127 Irazoqui *et al.* 2010; Boehnisch *et al.* 2011). Consistent with these studies, we found extensive DAF-16-  
128 dependent regulation of several CLECs and protist-type lysozymes (**Supplemental figure 2D**).  
129 Interestingly, the abundance of several lysozymes and CLECs is actually decreased in *daf-2* and/or DR  
130 animals. McElwee *et al.* have reported the downregulation of 7 CLEC domain containing genes in *daf-2*  
131 (McElwee *et al.* 2004). Boehnisch *et al.* have reported reduced expression of five out of eight protist-like  
132 lysozymes upon infection with the pathogenic *B. thuringiensis*, notwithstanding the requirement of  
133 these genes for a full host defense (Boehnisch *et al.* 2011). It therefore remains possible that these  
134 genes could have other functions and, perhaps, only indirectly influence *C. elegans* survival upon  
135 pathogen infection.

136 DR and IIS deficiency leads to differential expression of different aspartyl proteases (ASP-1,-3,-4,-5,-6,  
137 Y39B6A.24 and F28A12.4), Serine carboxypeptidases (F13D12.6, PCP-3 and Y16B4A.2), and cysteine  
138 proteases (CPL-1 and CPZ-1) (**Supplemental figure 2E**). Several groups have reported increased  
139 expression of aspartyl proteases upon pathogen infection, suggesting a role for cathepsins in worm  
140 innate immunity (O'Rourke *et al.* 2006; Wong *et al.* 2007; Simonsen *et al.* 2011). The exact role of

141 autophagy and cathepsins in the immune response is not entirely clear and can have either remediating  
 142 (Jia *et al.* 2009) or detrimental (Syntichaki *et al.* 2002; Wong *et al.* 2007) effects upon infection,  
 143 depending on the pathogen source.

144 **Supplemental Figures**

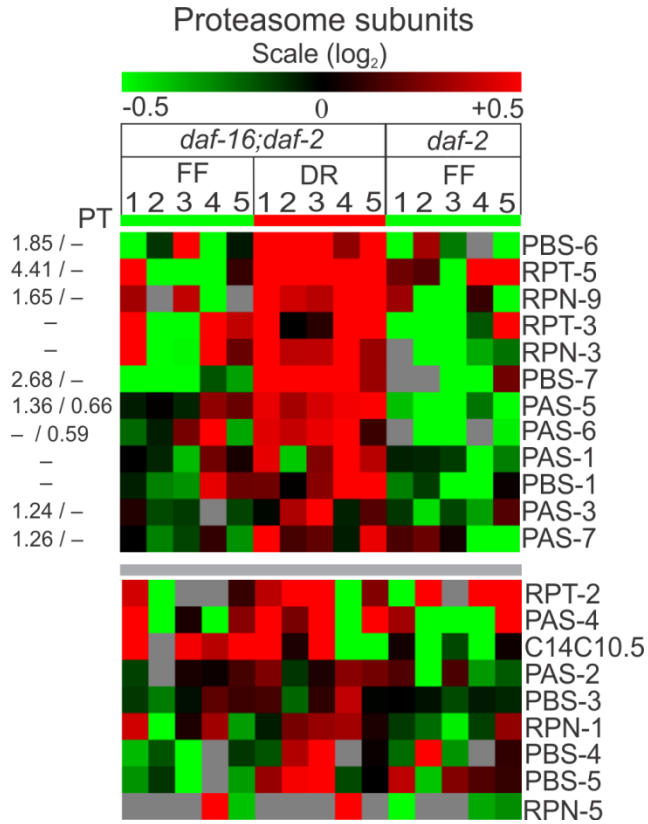

145

146 **Supplemental figure 1:** Upregulation of the proteasome complex in diet-restricted worms.

147

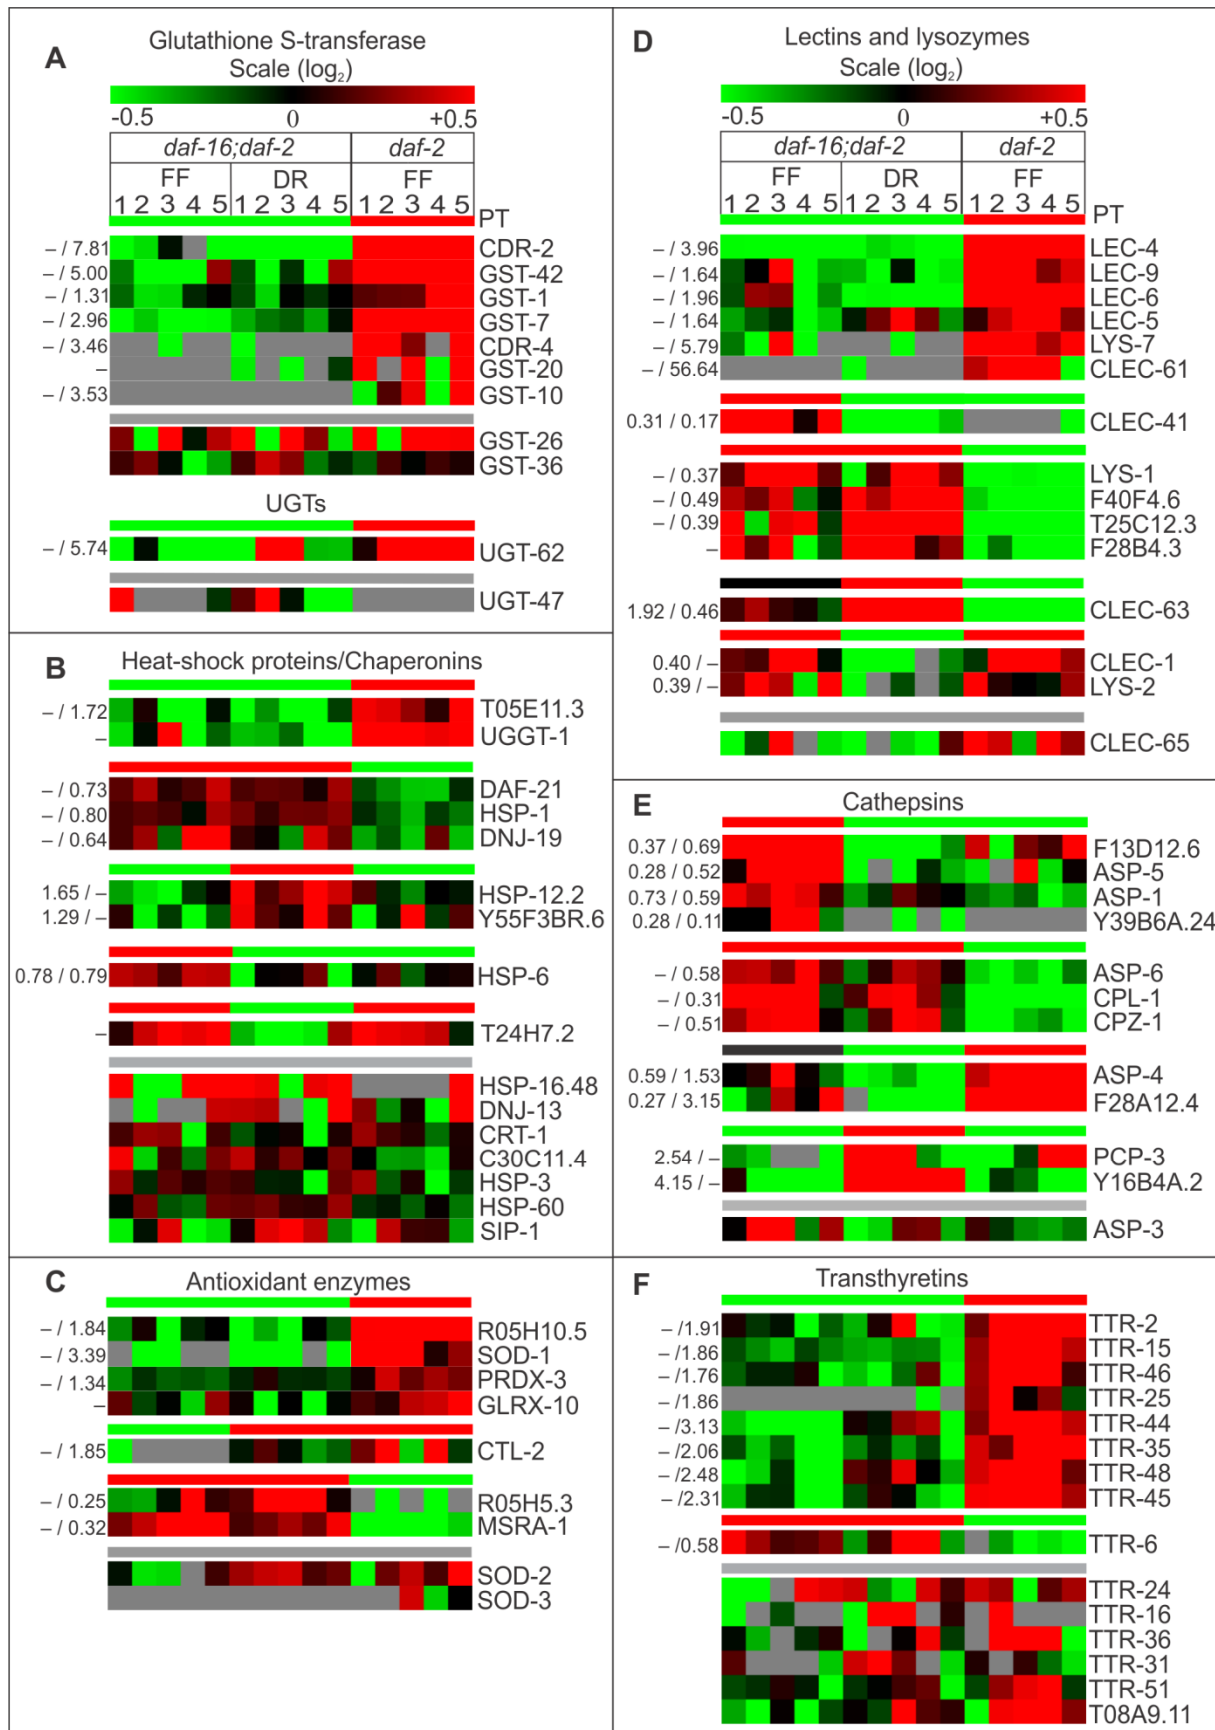



149

150 **Supplemental Figure 2:** Differential expression of enzymes in cellular stress defensive systems **(A-E)** and  
151 DAF-16 specific activation of transthyretin **(F)**.

## 152 **References**

- 153 Alper S, McBride SJ, Lackford B, Freedman JH , Schwartz DA (2007). Specificity and complexity of  
154 the Caenorhabditis elegans innate immune response. *Mol Cell Biol.* **27**, 5544-5553.
- 155 An JH , Blackwell TK (2003). SKN-1 links C. elegans mesendodermal specification to a conserved  
156 oxidative stress response. *Genes Dev.* **17**, 1882-1893.
- 157 Ayyadevara S, Dandapat A, Singh SP, Benes H, Zimniak L, Shmookler Reis RJ , Zimniak P (2005a).  
158 Lifespan extension in hypomorphic daf-2 mutants of Caenorhabditis elegans is partially  
159 mediated by glutathione transferase CeGSTP2-2. *Aging Cell.* **4**, 299-307.
- 160 Ayyadevara S, Dandapat A, Singh SP, Siegel ER, Shmookler Reis RJ, Zimniak L , Zimniak P (2007).  
161 Life span and stress resistance of Caenorhabditis elegans are differentially affected by  
162 glutathione transferases metabolizing 4-hydroxynon-2-enal. *Mech Ageing Dev.* **128**, 196-  
163 205.
- 164 Ayyadevara S, Engle MR, Singh SP, Dandapat A, Lichti CF, Benes H, Shmookler Reis RJ, Liebau E ,  
165 Zimniak P (2005b). Lifespan and stress resistance of Caenorhabditis elegans are increased  
166 by expression of glutathione transferases capable of metabolizing the lipid peroxidation  
167 product 4-hydroxynonenal. *Aging Cell.* **4**, 257-271.
- 168 Birnby DA, Link EM, Vowels JJ, Tian H, Colacurcio PL , Thomas JH (2000). A transmembrane  
169 guanylyl cyclase (DAF-11) and Hsp90 (DAF-21) regulate a common set of chemosensory  
170 behaviors in caenorhabditis elegans. *Genetics.* **155**, 85-104.
- 171 Bishop NA , Guarente L (2007). Two neurons mediate diet-restriction-induced longevity in C.  
172 elegans. *Nature.* **447**, 545-549.
- 173 Boehnisch C, Wong D, Habig M, Isermann K, Michiels NK, Roeder T, May RC , Schulenburg H (2011).  
174 Protist-type lysozymes of the nematode Caenorhabditis elegans contribute to resistance  
175 against pathogenic Bacillus thuringiensis. *PLoS One.* **6**, e24619.
- 176 Breusing N , Grune T (2008). Regulation of proteasome-mediated protein degradation during  
177 oxidative stress and aging. *Biol Chem.* **389**, 203-209.
- 178 Buzzi LI, Simonetta SH, Parodi AJ , Castro OA (2011). The two Caenorhabditis elegans UDP-  
179 glucose:glycoprotein glucosyltransferase homologues have distinct biological functions.  
180 *PLoS One.* **6**, e27025.
- 181 Cabreiro F, Picot CR, Friguet B , Petropoulos I (2006). Methionine sulfoxide reductases: relevance  
182 to aging and protection against oxidative stress. *Ann N Y Acad Sci.* **1067**, 37-44.
- 183 Chavez V, Mohri-Shiomi A , Garsin DA (2009). Ce-Duox1/BLI-3 generates reactive oxygen species  
184 as a protective innate immune mechanism in Caenorhabditis elegans. *Infect Immun.* **77**,  
185 4983-4989.

186 Chavez V, Mohri-Shiomi A, Maadani A, Vega LA , Garsin DA (2007). Oxidative stress enzymes are  
187 required for DAF-16-mediated immunity due to generation of reactive oxygen species by  
188 *Caenorhabditis elegans*. *Genetics*. **176**, 1567-1577.

189 Davies KJ (2001). Degradation of oxidized proteins by the 20S proteasome. *Biochimie*. **83**, 301-310.

190 Dong J, Boyd WA , Freedman JH (2008). Molecular characterization of two homologs of the  
191 *Caenorhabditis elegans* cadmium-responsive gene *cdr-1*: *cdr-4* and *cdr-6*. *J Mol Biol*. **376**,  
192 621-633.

193 Dong J, Song MO , Freedman JH (2005). Identification and characterization of a family of  
194 *Caenorhabditis elegans* genes that is homologous to the cadmium-responsive gene *cdr-1*.  
195 *Biochim Biophys Acta*. **1727**, 16-26.

196 Dong MQ, Venable JD, Au N, Xu T, Park SK, Cociorva D, Johnson JR, Dillin A , Yates JR, 3rd (2007).  
197 Quantitative mass spectrometry identifies insulin signaling targets in *C. elegans*. *Science*.  
198 **317**, 660-663.

199 Durieux J, Wolff S , Dillin A (2011). The cell-non-autonomous nature of electron transport chain-  
200 mediated longevity. *Cell*. **144**, 79-91.

201 Fleming CE, Nunes AF , Sousa MM (2009). Transthyretin: more than meets the eye. *Prog Neurobiol*.  
202 **89**, 266-276.

203 Garsin DA, Villanueva JM, Begun J, Kim DH, Sifri CD, Calderwood SB, Ruvkun G , Ausubel FM (2003).  
204 Long-lived *C. elegans* *daf-2* mutants are resistant to bacterial pathogens. *Science*. **300**, 1921-  
205 1921.

206 Guerin M , Parodi AJ (2003). The UDP-glucose : glycoprotein glucosyltransferase is organized in at  
207 least two tightly bound domains from yeast to mammals. *Journal of Biological Chemistry*.  
208 **278**, 20540-20546.

209 Halaschek-Wiener J, Khattra JS, McKay S, Pouzyrev A, Stott JM, Yang GS, Holt RA, Jones SJM, Marra  
210 MA, Brooks-Wilson AR , Riddle DL (2005). Analysis of long-lived *C. elegans* *daf-2* mutants  
211 using serial analysis of gene expression. *Genome Research*. **15**, 603-615.

212 Hansen M, Hsu AL, Dillin A , Kenyon C (2005). New genes tied to endocrine, metabolic, and dietary  
213 regulation of lifespan from a *Caenorhabditis elegans* genomic RNAi screen. *PLoS Genet*. **1**,  
214 119-128.

215 Hoeven R, McCallum KC, Cruz MR , Garsin DA (2011). Ce-Duox1/BLI-3 generated reactive oxygen  
216 species trigger protective SKN-1 activity via p38 MAPK signaling during infection in *C.*  
217 *elegans*. *PLoS Pathog*. **7**, e1002453.

218 Honda Y , Honda S (1999). The *daf-2* gene network for longevity regulates oxidative stress  
219 resistance and Mn-superoxide dismutase gene expression in *Caenorhabditis elegans*. *FASEB*  
220 *J*. **13**, 1385-1393.

221 Hsu AL, Murphy CT , Kenyon C (2003). Regulation of aging and age-related disease by DAF-16 and  
222 heat-shock factor. *Science*. **300**, 1142-1145.

223 Hunter S, Apweiler R, Attwood TK, Bairoch A, Bateman A, Binns D, Bork P, Das U, Daugherty L,  
224 Duquette L, Finn RD, Gough J, Haft D, Hulo N, Kahn D, Kelly E, Laugraud A, Letunic I,  
225 Lonsdale D, Lopez R, Madera M, Maslen J, McAnulla C, McDowall J, Mistry J, Mitchell A,  
226 Mulder N, Natale D, Orengo C, Quinn AF, Selengut JD, Sigrist CJ, Thimma M, Thomas PD,  
227 Valentin F, Wilson D, Wu CH , Yeats C (2009). InterPro: the integrative protein signature  
228 database. *Nucleic Acids Res*. **37**, D211-215.

229 Irazoqui JE, Troemel ER, Feinbaum RL, Luhachack LG, Cezairliyan BO , Ausubel FM (2010). Distinct  
230 pathogenesis and host responses during infection of *C. elegans* by *P. aeruginosa* and *S.*  
231 *aureus*. *PLoS Pathog.* **6**, e1000982.

232 Jia K, Thomas C, Akbar M, Sun Q, Adams-Huet B, Gilpin C , Levine B (2009). Autophagy genes  
233 protect against *Salmonella typhimurium* infection and mediate insulin signaling-regulated  
234 pathogen resistance. *Proc Natl Acad Sci U S A.* **106**, 14564-14569.

235 Jones LM, Staffa K, Perally S, LaCourse EJ, Brophy PM , Hamilton JV (2010). Proteomic analyses of  
236 *Caenorhabditis elegans* dauer larvae and long-lived *daf-2* mutants implicates a shared  
237 detoxification system in longevity assurance. *J Proteome Res.* **9**, 2871-2881.

238 Kahn NW, Rea SL, Moyle S, Kell A , Johnson TE (2008). Proteasomal dysfunction activates the  
239 transcription factor SKN-1 and produces a selective oxidative-stress response in  
240 *Caenorhabditis elegans*. *Biochem J.* **409**, 205-213.

241 Kim HY , Gladyshev VN (2007). Methionine sulfoxide reductases: selenoprotein forms and roles in  
242 antioxidant protein repair in mammals. *Biochem J.* **407**, 321-329.

243 Kimura K, Tanaka N, Nakamura N, Takano S , Ohkuma S (2007). Knockdown of mitochondrial heat  
244 shock protein 70 promotes progeria-like phenotypes in *caenorhabditis elegans*. *J Biol Chem.*  
245 **282**, 5910-5918.

246 Kokke BP, Leroux MR, Candido EP, Boelens WC , de Jong WW (1998). *Caenorhabditis elegans* small  
247 heat-shock proteins Hsp12.2 and Hsp12.3 form tetramers and have no chaperone-like  
248 activity. *FEBS Lett.* **433**, 228-232.

249 Kraft DC, Deocaris CC, Wadhwa R , Rattan SI (2006). Preincubation with the proteasome inhibitor  
250 MG-132 enhances proteasome activity via the Nrf2 transcription factor in aging human skin  
251 fibroblasts. *Ann N Y Acad Sci.* **1067**, 420-424.

252 Kwak MK, Wakabayashi N, Greenlaw JL, Yamamoto M , Kensler TW (2003). Antioxidants enhance  
253 mammalian proteasome expression through the Keap1-Nrf2 signaling pathway. *Mol Cell*  
254 *Biol.* **23**, 8786-8794.

255 Larsen PL (1993). Aging and resistance to oxidative damage in *Caenorhabditis elegans*. *Proc Natl*  
256 *Acad Sci U S A.* **90**, 8905-8909.

257 Lee J, Song HO, Jee C, Vanoaica L , Ahnn J (2005). Calcineurin regulates enteric muscle contraction  
258 through EXP-1, excitatory GABA-gated channel, in *C. elegans*. *J Mol Biol.* **352**, 313-318.

259 Leiers B, Kampkotter A, Grevelding CG, Link CD, Johnson TE , Henkle-Duhrsen K (2003). A stress-  
260 responsive glutathione S-transferase confers resistance to oxidative stress in  
261 *Caenorhabditis elegans*. *Free Radic Biol Med.* **34**, 1405-1415.

262 Li X, Matilainen O, Jin C, Glover-Cutter KM, Holmberg CI , Blackwell TK (2011). Specific SKN-1/Nrf  
263 stress responses to perturbations in translation elongation and proteasome activity. *PLoS*  
264 *Genet.* **7**, e1002119.

265 Mallo GV, Kurz CL, Couillault C, Pujol N, Granjeaud S, Kohara Y , Ewbank JJ (2002). Inducible  
266 antibacterial defense system in *C. elegans*. *Curr Biol.* **12**, 1209-1214.

267 McElwee J, Bubb K , Thomas JH (2003). Transcriptional outputs of the *Caenorhabditis elegans*  
268 forkhead protein DAF-16. *Aging Cell.* **2**, 111-121.

269 McElwee JJ, Schuster E, Blanc E, Thomas JH , Gems D (2004). Shared transcriptional signature in  
270 *Caenorhabditis elegans* Dauer larvae and long-lived *daf-2* mutants implicates detoxification  
271 system in longevity assurance. *J Biol Chem.* **279**, 44533-44543.

272 Minniti AN, Cataldo R, Trigo C, Vasquez L, Mujica P, Leighton F, Inestrosa NC, Aldunate R (2009).  
273 Methionine sulfoxide reductase A expression is regulated by the DAF-16/FOXO pathway in  
274 *Caenorhabditis elegans*. *Aging Cell*. **8**, 690-705.

275 Mohri-Shiomi A, Garsin DA (2008). Insulin signaling and the heat shock response modulate protein  
276 homeostasis in the *Caenorhabditis elegans* intestine during infection. *J Biol Chem*. **283**, 194-  
277 201.

278 Morley JF, Morimoto RI (2004). Regulation of longevity in *Caenorhabditis elegans* by heat shock  
279 factor and molecular chaperones. *Mol Biol Cell*. **15**, 657-664.

280 Murphy CT, McCarroll SA, Bargmann CI, Fraser A, Kamath RS, Ahringer J, Li H, Kenyon C (2003).  
281 Genes that act downstream of DAF-16 to influence the lifespan of *Caenorhabditis elegans*.  
282 *Nature*. **424**, 277-283.

283 Nagaraj SH, Gasser RB, Ranganathan S (2008). Needles in the EST haystack: large-scale  
284 identification and analysis of excretory-secretory (ES) proteins in parasitic nematodes using  
285 expressed sequence tags (ESTs). *PLoS Negl Trop Dis*. **2**, e301.

286 Niu W, Lu ZJ, Zhong M, Sarov M, Murray JI, Brdlik CM, Janette J, Chen C, Alves P, Preston E, Slightham  
287 C, Jiang L, Hyman AA, Kim SK, Waterston RH, Gerstein M, Snyder M, Reinke V (2011).  
288 Diverse transcription factor binding features revealed by genome-wide ChIP-seq in *C.*  
289 *elegans*. *Genome Res*. **21**, 245-254.

290 O'Rourke D, Baban D, Demidova M, Mott R, Hodgkin J (2006). Genomic clusters, putative pathogen  
291 recognition molecules, and antimicrobial genes are induced by infection of *C. elegans* with  
292 *M. nematophilum*. *Genome Research*. **16**, 1005-1016.

293 Oliveira RP, Abate JP, Dilks K, Landis J, Ashraf J, Murphy CT, Blackwell TK (2009). Condition-  
294 adapted stress and longevity gene regulation by *Caenorhabditis elegans* SKN-1/Nrf. *Aging*  
295 *Cell*. **8**, 524-541.

296 Opalach K, Rangaraju S, Madorsky I, Leeuwenburgh C, Notterpek L (2010). Lifelong calorie  
297 restriction alleviates age-related oxidative damage in peripheral nerves. *Rejuvenation Res*.  
298 **13**, 65-74.

299 Radhakrishnan SK, Lee CS, Young P, Beskow A, Chan JY, Deshaies RJ (2010). Transcription factor  
300 Nrf1 mediates the proteasome recovery pathway after proteasome inhibition in mammalian  
301 cells. *Mol Cell*. **38**, 17-28.

302 Saverwyns H, Visser A, Van Durme J, Power D, Morgado I, Kennedy MW, Knox DP, Schymkowitz J,  
303 Rousseau F, Gevaert K, Vercruyssen J, Claerebout E, Geldhof P (2008). Analysis of the  
304 transthyretin-like (TTL) gene family in *Ostertagia ostertagi*--comparison with other  
305 stronglyid nematodes and *Caenorhabditis elegans*. *Int J Parasitol*. **38**, 1545-1556.

306 Schulenburg H, Hoepfner MP, Weiner J, 3rd, Bornberg-Bauer E (2008). Specificity of the innate  
307 immune system and diversity of C-type lectin domain (CTLN) proteins in the nematode  
308 *Caenorhabditis elegans*. *Immunobiology*. **213**, 237-250.

309 Sheehan D, Meade G, Foley VM, Dowd CA (2001). Structure, function and evolution of glutathione  
310 transferases: implications for classification of non-mammalian members of an ancient  
311 enzyme superfamily. *Biochem J*. **360**, 1-16.

312 Simonsen KT, Moller-Jensen J, Kristensen AR, Andersen JS, Riddle DL, Kallipolitis BH (2011).  
313 Quantitative proteomics identifies ferritin in the innate immune response of *C. elegans*.  
314 *Virulence*. **2**, 120-130.

315 Singh V , Aballay A (2006). Heat-shock transcription factor (HSF)-1 pathway required for  
316 Caenorhabditis elegans immunity. *Proc Natl Acad Sci U S A.* **103**, 13092-13097.

317 Sonnhammer EL , Durbin R (1997). Analysis of protein domain families in Caenorhabditis elegans.  
318 *Genomics.* **46**, 200-216.

319 Swindell WR, Masternak MM, Kopchick JJ, Conover CA, Bartke A , Miller RA (2009). Endocrine  
320 regulation of heat shock protein mRNA levels in long-lived dwarf mice. *Mech Ageing Dev.*  
321 **130**, 393-400.

322 Syntichaki P, Xu KL, Driscoll M , Tavernarakis N (2002). Specific aspartyl and calpain proteases are  
323 required for neurodegeneration in C-elegans. *Nature.* **419**, 939-944.

324 Tawe WN, Eschbach ML, Walter RD , Henkle-Duhrsen K (1998). Identification of stress-responsive  
325 genes in Caenorhabditis elegans using RT-PCR differential display. *Nucleic Acids Res.* **26**,  
326 1621-1627.

327 Troemel ER, Chu SW, Reinke V, Lee SS, Ausubel FM , Kim DH (2006). p38 MAPK regulates  
328 expression of immune response genes and contributes to longevity in C. elegans. *PLoS Genet.*  
329 **2**, e183.

330 Tukey RH , Strassburg CP (2000). Human UDP-glucuronosyltransferases: metabolism, expression,  
331 and disease. *Annu Rev Pharmacol Toxicol.* **40**, 581-616.

332 Tullet JM, Hertweck M, An JH, Baker J, Hwang JY, Liu S, Oliveira RP, Baumeister R , Blackwell TK  
333 (2008). Direct inhibition of the longevity-promoting factor SKN-1 by insulin-like signaling in  
334 C. elegans. *Cell.* **132**, 1025-1038.

335 Vanfleteren JR (1993). Oxidative stress and ageing in Caenorhabditis elegans. *Biochem J.* **292 ( Pt**  
336 **2)**, 605-608.

337 Wang J , Kim SK (2003). Global analysis of dauer gene expression in Caenorhabditis elegans.  
338 *Development.* **130**, 1621-1634.

339 Wang J, Nakad R , Schulenburg H (2011). Activation of the Caenorhabditis elegans FOXO family  
340 transcription factor DAF-16 by pathogenic Bacillus thuringiensis. *Dev Comp Immunol.*

341 Wang X, Yen J, Kaiser P , Huang L (2010). Regulation of the 26S proteasome complex during  
342 oxidative stress. *Sci Signal.* **3**, ra88.

343 Wong D, Bazopoulou D, Pujol N, Tavernarakis N , Ewbank JJ (2007). Genome-wide investigation  
344 reveals pathogen-specific and shared signatures in the response of Caenorhabditis elegans  
345 to infection. *Genome Biology.* **8**, -.

346 Yokoyama K, Fukumoto K, Murakami T, Harada S, Hosono R, Wadhwa R, Mitsui Y , Ohkuma S  
347 (2002). Extended longevity of Caenorhabditis elegans by knocking in extra copies of  
348 hsp70F, a homolog of mot-2 (mortalin)/mthsp70/Grp75. *FEBS Lett.* **516**, 53-57.

349 Yoneda T, Benedetti C, Urano F, Clark SG, Harding HP , Ron D (2004). Compartment-specific  
350 perturbation of protein handling activates genes encoding mitochondrial chaperones. *J Cell*  
351 *Sci.* **117**, 4055-4066.

352

353
