# Supplementary material
Source: PubMed Central journal article supplement (PMC3861712)
Supplement: supp_M113.027383_mcp.M113.027383-7.pdf [file supp_M113.027383_mcp.M113.027383-7.pdf]

| <b>Representative term (GO, INTERPRO, KEGG PATHWAY)</b>                                               | <b>Enrichment score</b> | <b>P value</b> |
|-------------------------------------------------------------------------------------------------------|-------------------------|----------------|
| <b>Downregulated in <i>daf-2(e1370)</i></b>                                                           |                         |                |
| GO:0030529~ribonucleoprotein complex                                                                  | 24.30                   | 8.32E-34       |
| GO:0009792~embryonic development ending in birth or egg hatching                                      | 15.26                   | 3.09E-17       |
| GO:0018988~molting cycle, protein-based cuticle                                                       | 5.57                    | 2.65E-06       |
| GO:0045735~nutrient reservoir activity                                                                | 5.07                    | 3.47E-08       |
| GO:0010259~multicellular organismal aging                                                             | 4.99                    | 1.03E-05       |
| GO:0070001~aspartic-type peptidase activity                                                           | 2.76                    | 3.00E-05       |
| GO:0008233~peptidase activity                                                                         | 2.39                    | 1.71E-03       |
| GO:0040019~positive regulation of embryonic development                                               | 1.82                    | 1.89E-04       |
| GO:0051082~unfolded protein binding                                                                   | 1.64                    | 2.23E-02       |
| GO:0043039~tRNA aminoacylation                                                                        | 1.44                    | 2.89E-02       |
| <b>Upregulated in <i>daf-2(e1370)</i></b>                                                             |                         |                |
| GO:0005739~mitochondrion                                                                              | 20.70                   | 5.93E-25       |
| GO:0006091~generation of precursor metabolites and energy                                             | 13.16                   | 8.43E-24       |
| GO:0006006~glucose metabolic process                                                                  | 7.60                    | 6.25E-11       |
| GO:0022900~electron transport chain                                                                   | 7.60                    | 4.11E-08       |
| IPR002198:Short-chain dehydrogenase/reductase SDR                                                     | 6.40                    | 2.96E-12       |
| GO:0005509~calcium ion binding                                                                        | 3.45                    | 2.52E-08       |
| KEGG_PATHWAY cel00071:Fatty acid metabolism                                                           | 2.93                    | 9.07E-05       |
| GO:0006572~tyrosine catabolic process                                                                 | 2.63                    | 2.89E-05       |
| GO:0045927~positive regulation of growth                                                              | 2.62                    | 5.18E-04       |
| GO:0003779~actin binding, SP_PIR_KEYWORDS muscle proteins                                             | 2.46                    | 9.01E-06       |
| GO:0030239~myofibril assembly                                                                         | 2.06                    | 2.69E-03       |
| GO:0002119~nematode larval development                                                                | 1.89                    | 5.73E-03       |
| KEGG_PATHWAY cel00480:Glutathione metabolism                                                          | 1.76                    | 3.32E-03       |
| GO:0006098~pentose-phosphate shunt                                                                    | 1.62                    | 8.38E-03       |
| GO:0005529~sugar binding, SP_PIR_KEYWORDS Lectin, IPR001079<br>Galectin carbohydrate recognition site | 1.51                    | 2.43E-04       |
| GO:0008340~determination of adult life span                                                           | 1.51                    | 3.09E-02       |
| IPR002328:Alcohol dehydrogenase, zinc-containing, conserved site                                      | 1.36                    | 3.96E-03       |
| <b>Upregulated in DR</b>                                                                              |                         |                |
| GO:0002119~nematode larval development                                                                | 7.88                    | 2.12E-10       |
| GO:0016459~myosin complex                                                                             | 5.22                    | 5.42E-10       |
| GO:0005839~proteasome core complex                                                                    | 4.00                    | 4.45E-08       |
| GO:0048581~negative regulation of post-embryonic development                                          | 2.87                    | 7.05E-06       |
| GO:0008380~RNA splicing, KEGG PATHWAY cel03040:Spliceosome                                            | 2.64                    | 1.37E-04       |
| GO:0055114~oxidation reduction, GO:0045333~cellular respiration                                       | 2.36                    | 5.69E-05       |
| GO:0045111~intermediate filament cytoskeleton                                                         | 2.15                    | 1.57E-03       |
| GO:0051536~iron-sulfur cluster binding                                                                | 2.02                    | 8.95E-03       |
| GO:0000166~nucleotide binding                                                                         | 1.97                    | 3.22E-04       |
| GO:0042625~ATPase activity, coupled to transmembrane movement of ions                                 | 1.85                    | 8.00E-04       |

|                                                                                 |       |          |
|---------------------------------------------------------------------------------|-------|----------|
| GO:0008340~determination of adult life span                                     | 1.71  | 1.91E-02 |
| GO:0018988~molting cycle, protein-based cuticle                                 | 1.67  | 2.11E-02 |
| <b>Downregulated in DR</b>                                                      |       |          |
| GO:0005840~ribosome                                                             | 26.35 | 1.23E-49 |
| GO:0010259~multicellular organismal aging                                       | 6.20  | 6.21E-07 |
| GO:0018988~molting cycle, protein-based cuticle                                 | 4.65  | 2.19E-05 |
| GO:0045735~nutrient reservoir activity, IPR015816: Vitellinogen                 | 3.23  | 1.24E-06 |
| GO:0019843~rRNA binding                                                         | 2.99  | 4.09E-04 |
| GO:0055114~oxidation reduction                                                  | 2.71  | 2.20E-04 |
| GO:0046394~carboxylic acid biosynthetic process                                 | 2.33  | 9.79E-04 |
| GO:0070001~aspartic-type peptidase activity                                     | 2.26  | 2.60E-07 |
| GO:0019842~vitamin binding, GO:0070279~vitamin B6 binding                       | 2.15  | 1.30E-02 |
| IPR002198:Short-chain dehydrogenase/reductase SDR                               | 2.10  | 1.57E-04 |
| GO:0005783~endoplasmic reticulum, INTERPRO IPR006662:Thioredoxin-like subdomain | 1.83  | 1.16E-03 |
| GO:0045927~positive regulation of growth                                        | 1.68  | 1.85E-02 |
| KEGG PATHWAY cel00640:Propanoate metabolism                                     | 1.43  | 3.30E-02 |

**Supplemental table 1:** Gene ontology information from Database for Annotation, Visualization and Integrated Discovery (DAVID) Bioinformatics Resource 6.7 (<http://david.abcc.ncifcrf.gov/>) of proteins that are respectively down- or up-regulated in *daf-2* or diet-restricted nematodes, respectively. Reported *P* value is the modified Fisher Exact *P* value or EASE score. Only clusters with Enrichment score > 1.3 are shown.
