# Supplementary material
Source: PubMed Central journal article supplement (PMC3861712)
Supplement: supp_M113.027383_mcp.M113.027383-8.pdf [file supp_M113.027383_mcp.M113.027383-8.pdf]

| Gene          | Coding sequence | Forward primer            | Reverse primer              | DR <i>glp-4 daf-16; daf-2</i> |         | <i>glp-4; daf-2</i> |              |
|---------------|-----------------|---------------------------|-----------------------------|-------------------------------|---------|---------------------|--------------|
|               |                 |                           |                             | Fold change                   | P value | Fold change         | P value *    |
| <i>rpl-4</i>  | B0041.4         | GTCTGCCTTCAAGAAGCTTGATAC  | CTTTGGAGCTCTGATAGCCTTAAC    | 0.99                          | 0.89    | <b><u>1.45</u></b>  | <b>0.030</b> |
| <i>rpl-6</i>  | R151.3          | ACGACGAGTACTTCAAGAGAAAGTC | GTGAGAATCTCGTTCCAAGGTATC    | 1.01                          | 0.78    | <b><u>1.41</u></b>  | <b>0.029</b> |
| <i>rpl-7</i>  | F53G12.10       | AACAAGGAGAAGAAGACCCAATACT | CTTTGGATGAAGCTGGTTGATA      | 0.97                          | 0.78    | <b><u>1.51</u></b>  | <b>0.020</b> |
| <i>rpl-9</i>  | R13A5.8         | AAACAGAACTGTTGAGATCCGTAAC | GGACATCATTTCCCTCGACTAC      | 0.97                          | 0.99    | 1.29                | 0.060        |
| <i>rpl-19</i> | C09D4.5         | GAAACTCCAAATACTGGGTAGCA   | CAGAAATCTCGTGACCTCATT       | 0.94                          | 0.21    | <b>1.58</b>         | <b>0.018</b> |
| <i>rpl-21</i> | C14B9.7         | CTCCACCTACTACACCCAGTACAAG | GATGTTGATTCTCTTTGGAAGAATG   | 0.96                          | 0.70    | 1.18                | 0.177        |
| <i>rpl-23</i> | B0336.10        | GCCAAGAACTTGTTGTCATCT     | TTCTTTCTGAGCTCTGGCTTTC      | 1.04                          | 0.41    | <b><u>1.43</u></b>  | <b>0.024</b> |
| <i>rpl-27</i> | C53H9.1         | CCTTCGATAAGACCAACATCAAC   | CAATTTGGTGAAGAACCACCTTGT    | 0.93                          | 0.55    | <b><u>1.41</u></b>  | <b>0.047</b> |
| <i>rpl-30</i> | Y106G6H.3       | AGAAAAATGCTGAGAACATCAACTC | CGTAGTACTCAATCTCGGACTTTCT   | 1.04                          | 0.73    | 1.15                | 0.333        |
| <i>rpl-31</i> | W09C5.6         | GACACCAAGCTCAACAAGTTCAT   | AACGTAGGTGCAGAGGGTGTAG      | 0.97                          | 0.86    | 1.23                | 0.158        |
| <i>rpl-35</i> | ZK652.4         | AGTTCACGCTGACCACAAGTACA   | GGATAACAATGAATACAAGCCACTT   | 1.01                          | 0.79    | <b><u>1.44</u></b>  | <b>0.020</b> |
| <i>rpl-36</i> | F37C12.4        | GTCAAACAGACACAAGGGAGTC    | GGAGTTCCTCTCTTTCCCTTAG      | 0.96                          | 0.45    | <b><u>1.39</u></b>  | <b>0.040</b> |
| <i>rpl-43</i> | Y48B6A.2        | AGAACTAAGAAGGTCGGAATCGT   | CAGTCTTCTGATGGTGGATCTG      | 1.05                          | 0.92    | 1.35                | 0.051        |
| <i>rps-0</i>  | B0393.1         | ACCAAATATCATCAACGTCAAGAAG | GTTGGTAAGACATCCTGGAGAGAA    | 1.09                          | 0.24    | <b>1.56</b>         | <b>0.033</b> |
| <i>rps-1</i>  | F56F3.5         | GAACAATAACAAGATGGGAAAGAAG | TAGTTCCTTGGGTCTGTTGATAAG    | 1.09                          | 0.31    | <b><u>1.47</u></b>  | <b>0.022</b> |
| <i>rps-2</i>  | C49H3.11        | GAAGACTCGTCAAGGAGAAGAAGAT | GAGATCTTGAGGACCTCGTCTTTA    | 1.06                          | 0.55    | 1.24                | 0.116        |
| <i>rps-3</i>  | C23G10.3        | AAGGTCAAGATCATGCTTCCATAC  | AACATCCTTCTTCTCCTCCTTGT     | 1.04                          | 0.45    | <b><u>1.27</u></b>  | <b>0.036</b> |
| <i>rps-8</i>  | F42C5.8         | CACCACACCATGAAAAAGTACAC   | AGTTCCTTTCCTTCGAGGATGTAT    | 1.01                          | 0.76    | <b><u>1.45</u></b>  | <b>0.031</b> |
| <i>rps-9</i>  | F40F8.10        | CTGAAGACTGTGCAATCTAAAGTGA | CTTTGGATCCTTGTCTTCAAGAGT    | 1.06                          | 0.48    | <b><u>1.34</u></b>  | <b>0.047</b> |
| <i>rps-10</i> | D1007.6         | ACACCAAGCTCATCTATGAGTACCT | GTACTIONCACGGAGGTACAAGATTCC | 1.04                          | 0.60    | <b><u>1.42</u></b>  | <b>0.027</b> |
| <i>rps-11</i> | F40F11.1        | GGATCTAAGAAGACTCCACGTTACA | CGGTACTIONCTTGTAGTGAAGGT    | 0.95                          | 0.54    | 1.22                | 0.089        |
| <i>rps-13</i> | C16A3.9         | AGGATTTGTACCATCTCGTCAAG   | AGCTGACGCTTGGTCTTGTAGTAT    | 0.98                          | 1.00    | <b><u>1.55</u></b>  | <b>0.043</b> |
| <i>rps-15</i> | F36A2.6         | AATCTACAACGGAAAGGTTTTCAAC | GGAAGAGTGGGTAGCTCCAATAC     | 1.01                          | 0.86    | 1.21                | 0.062        |
| <i>rps-18</i> | Y57G11C.16      | CCTTAACAGACAAAAGGACATCAAG | ACAATCAGACTTATCCTCCCTTCTT   | 0.97                          | 0.31    | <b><u>1.27</u></b>  | <b>0.040</b> |
| <i>rps-19</i> | T05F1.3         | CAGTCTTGCTCGTCACTTGTATTT  | CTTCTCAACCCACTTGATCTTCTC    | 0.92                          | 0.43    | 1.30                | 0.060        |
| <i>rps-24</i> | T07A9.11        | AAGCTTTATAAGACCACTCCAGACA | GGACCTTCTTTGTCTGTTCTTTC     | 0.93                          | 0.33    | 1.14                | 0.144        |
| <i>rps-27</i> | F56E10.4        | GTTCAACACCCAAACTCCTACTTC  | CAATTACGGGAACTTATTGCTTCT    | 1.02                          | 0.50    | <b><u>1.37</u></b>  | <b>0.028</b> |

**Supplemental table 2. qRT-PCR of selected ribosomal protein subunits.** Average mRNA expression level of muscle expressed genes compared to the fully fed *glp-4 daf-16,daf-2* strain (FF, fully fed; DR, dietary restricted by bacterial dilution) with corresponding *P* values and the 95% Confidence interval (CI) levels (-95% CI, lower interval; +95% CI, upper interval).
