# Supplementary material
Source: PubMed Central journal article supplement (PMC3861712)
Supplement: supp_M113.027383_mcp.M113.027383-9.pdf [file supp_M113.027383_mcp.M113.027383-9.pdf]

| Gene          | Coding sequence | Forward primer              | Reverse primer            | DR <i>glp-4 daf-16; daf-2</i> |                 | <i>glp-4; daf-2</i> |                 |
|---------------|-----------------|-----------------------------|---------------------------|-------------------------------|-----------------|---------------------|-----------------|
|               |                 |                             |                           | Fold change                   | <i>P</i> value* | Fold change         | <i>P</i> value* |
| <i>act-1</i>  | T04C12.6        | ATCGTCACCACCAGCTTTCTAT      | GCAAATGAGTGAAAGGACAATAAG  | 0.93                          | 9.79E-01        | <b>1.79</b>         | <b>2.66E-04</b> |
| <i>anc-1</i>  | ZK973.6         | GAAATTATTGAGGAACGACGTAGAA   | CGATTTTATCGTTGTCTTGGTAAG  | <b>0.59</b>                   | <b>4.27E-02</b> | 1.10                | 8.84E-01        |
| <i>csq-1</i>  | F40E10.3        | AACTGAGGTTCTGACCGAGAAG      | TACTGGTCAAGCTCTGAGTCGTC   | <b>0.62</b>                   | <b>1.37E-03</b> | <b>6.15</b>         | <b>5.47E-07</b> |
| <i>myo-1</i>  | R06C7.10        | TACACTGACTCTGTTGCTCGTATGT   | ATTCTCATGGTCTTGAAGCATGTA  | <b>1.65</b>                   | <b>1.44E-02</b> | <b>2.55</b>         | <b>2.17E-04</b> |
| <i>lev-11</i> | Y105E8B.1       | CAAGTCGACGAGGCTAAGGTTAT     | CCTCAAGTGACTTCAAGTTGTTTC  | 1.41                          | 2.16E-01        | <b>2.20</b>         | <b>1.29E-03</b> |
| <i>mlc-1</i>  | C36E6.3         | CCCTTAGTTTTATAGCCGAGATCAT   | AAAACCATTTGGAGTGATAGAAGTG | 0.53                          | 1.70E-01        | <b>3.51</b>         | <b>1.68E-04</b> |
| <i>mlc-2</i>  | C36E6.5         | GAGCTTTTGCTATGTTTCGATAAGAA  | CTTTCCTTGTACATAGCCTTGAC   | 0.82                          | 9.52E-02        | <b>3.43</b>         | <b>3.14E-06</b> |
| <i>mlc-3</i>  | F09F7.2         | CAAGGAACCTACGCTGACTTCTAC    | ACCTTCTTGATGAAATCCTCGTACT | 1.01                          | 4.38E-01        | <b>3.46</b>         | <b>1.72E-05</b> |
| <i>myo-2</i>  | T18D3.4         | ACTAAAACCGCTGGAGATAATGTAA   | CATCGTTAAGGAAAGTCAGGTTAGA | <b>1.71</b>                   | <b>1.33E-02</b> | <b>3.10</b>         | <b>1.10E-04</b> |
| <i>myo-3</i>  | K12F2.1         | TAACTGTGAAGGGAAACCAGATTAC   | TCAAAAAGGTCAAGTTAGCCATATC | <b>1.84</b>                   | <b>1.36E-02</b> | <b>9.19</b>         | <b>2.90E-05</b> |
| <i>pfn-3</i>  | K03E6.6         | AACTATCCAAGCCGTTATTATTTCC   | ATTGTGATCAGTACTTGATGGACCT | 0.56                          | 1.67E-01        | <b>2.04</b>         | <b>1.56E-03</b> |
| <i>ttn-3</i>  | T20B3.2         | TCTTGACTCCAGAAAGAAAGAAGAA   | TAGATCTTCAAGAGTTGTCCCTGAT | 0.90                          | 1.19E-01        | <b>1.36</b>         | <b>5.90E-03</b> |
| <i>unc-15</i> | F07A5.7         | AGTATGAAGAGCAAATCGAGATCAT   | CCTTCTCAAGATCAACGATAAGAAC | 0.90                          | 2.34E-01        | <b>3.89</b>         | <b>7.06E-07</b> |
| <i>unc-27</i> | ZK721.2         | TCACTCAAGAAGGTGTCGAAGTA     | GGCTTGTCGTCCTTCTTCTTAAC   | 0.40                          | 1.30E-01        | <b>3.20</b>         | <b>1.02E-03</b> |
| <i>unc-54</i> | F11C3.3         | GCAGTTGTGGATTAACCTTCGTAAC   | ACTCTTCATCAAGCATGGAGATAAT | 0.80                          | 1.63E-01        | <b>3.86</b>         | <b>3.23E-05</b> |
| <i>unc-60</i> | C38C3.5         | GTCTTCTTCACATTTTCACCTCTTAAC | TACCCGGCACATTGTATTAAATTAG | 0.92                          | 4.43E-01        | 1.18                | 9.19E-02        |

**Supplemental table 3. qRT-PCR of selected muscle-related proteins.** Average mRNA expression level of muscle expressed genes compared to the fully fed *glp-4 daf-16,daf-2* strain (FF, fully fed; DR, dietary restricted by bacterial dilution) with corresponding *P* values and the 95% Confidence interval (CI) levels (-95% CI, lower interval; +95% CI, upper interval).
