# Supplementary material
Source: PubMed Central journal article supplement (PMC3861712)

Dong *et al.*(2007) up-regulated in *daf-2*

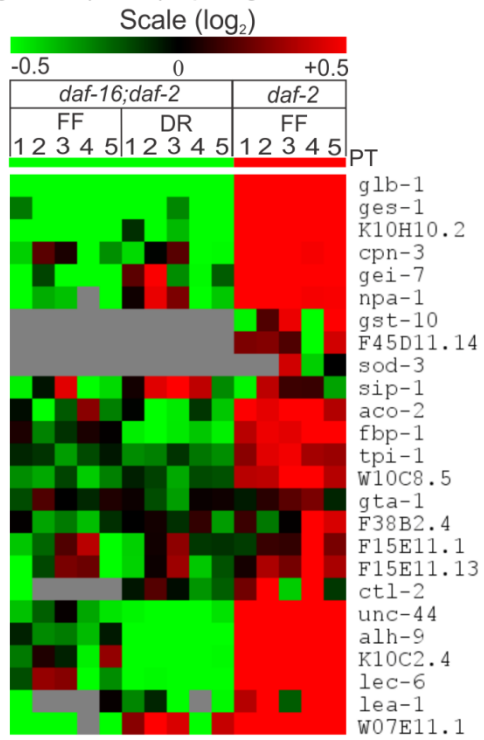

Dong *et al.*(2007) down-regulated in *daf-2*

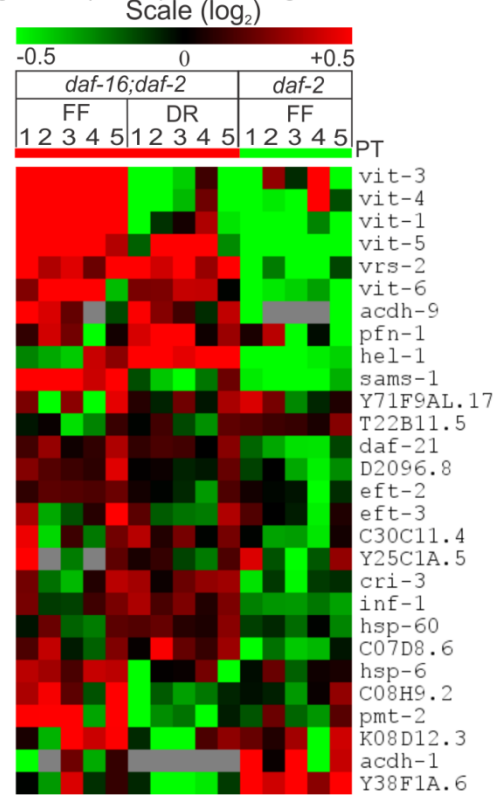

Supplement: supp_M113.027383_mcp.M113.027383-4.pdf [file supp_M113.027383_mcp.M113.027383-4.pdf]
